# Supplementary material for: Whole-exome analysis in osteosarcoma to identify a personalized therapy
Source: PubMed Central journal article supplement (PMC5655208; doi:10.18632/oncotarget.19010), 2017-07-05
Supplement: oncotarget-08-80416-s001.pdf [file oncotarget-08-80416-s001.pdf]

## **Whole-exome analysis in osteosarcoma to identify a personalized therapy**

### **Supplementary Materials**

**Supplementary Table 1: Mutated genes in the 87% (7/8), 75% (6/8) and 62.5% (5/8) of osteosarcoma patients and their chromosomal location. The samples showing the mutated gene are highlighted in gray. See Supplementary\_Table\_1**
